# Supplementary material for: Formation of antimony sulfide powders and thin films from single-source antimony precursors
Source: Royal Society of Chemistry journal article supplement (doi:10.1039/b810947h), 2008-01-01

**Table S(1a):** Lattice and Refinement Parameter of Sb<sub>2</sub>S<sub>3</sub> from Sb(xanthate)<sub>3</sub> precursors

| Precursor                                          | Method                 | Time/temp. (°C)        | <i>a</i>      | <i>b</i>    | <i>c</i>      | Vol (nm <sup>3</sup> ) | Av. cryst. size (nm) |
|----------------------------------------------------|------------------------|------------------------|---------------|-------------|---------------|------------------------|----------------------|
| Sb(S <sub>2</sub> COPr <sup>n</sup> ) <sub>3</sub> | solvothermal treatment | 5 min / 197            | 11.3083 (16)  | 3.8429 (5)  | 11.2314 (17)  | 487.4 (1)              | 269                  |
|                                                    |                        | 30 min / 197           | 11.3077 (11)  | 3.8361 (3)  | 11.2270 (11)  | 487.0 (1)              | 625                  |
|                                                    |                        | 2 h / 197              | 11.3090 (11)  | 3.8370 (3)  | 11.2273 (11)  | 487.2 (1)              | 435                  |
|                                                    | hydrothermal treatment | 2 h / 160              | 11.3271 (180) | 3.8429 (42) | 11.2459 (169) | 489.5 (12)             | 27                   |
|                                                    |                        | 2 h / 200              | 11.3064 (17)  | 3.8369 (4)  | 11.2312 (16)  | 487.2 (1)              | 128                  |
|                                                    |                        | 36 h / 200             | 11.3093 (26)  | 3.8395 (7)  | 11.2364 (26)  | 487.9 (2)              | 85                   |
| Sb(S <sub>2</sub> COBu <sup>i</sup> ) <sub>3</sub> | solvothermal treatment | 5 min / 197            | 11.3083 (18)  | 3.8391 (5)  | 11.2295 (18)  | 487.5 (1)              | 192                  |
|                                                    |                        | 30 min / 197           | 11.3084 (10)  | 3.8379 (3)  | 11.2302 (11)  | 487.4 (1)              | 448                  |
|                                                    |                        | 2 h / 197              | 11.3084 (15)  | 3.8379 (4)  | 11.2294 (15)  | 487.4 (1)              | 197                  |
|                                                    | hydrothermal treatment | 2 h / 160 <sup>b</sup> | -             | -           | -             | -                      | -                    |
|                                                    |                        | 2 h / 200              | 11.3089 (23)  | 3.8364 (6)  | 11.2314 (24)  | 487.3 (2)              | 113                  |
|                                                    |                        | 36 h / 200             | 11.3078 (19)  | 3.8364 (5)  | 11.2298 (19)  | 487.2 (1)              | 141                  |

**Table S(1b):** Lattice and Refinement Parameter of Sb<sub>2</sub>S<sub>3</sub> from Sb(dithiocarbamate)<sub>3</sub> precursors

| Precursor                                                          | Method                    | Time/temp. (°C)        | <i>a</i>     | <i>b</i>    | <i>c</i>     | Vol (nm <sup>3</sup> ) | Av. cryst. size (nm) |
|--------------------------------------------------------------------|---------------------------|------------------------|--------------|-------------|--------------|------------------------|----------------------|
| Sb(S <sub>2</sub> CNEt <sub>2</sub> ) <sub>3</sub>                 | solvothermal<br>treatment | 5 min / 197            | 11.3071 (14) | 3.8373 (4)  | 11.2266 (15) | 487.1 (1)              | 410                  |
|                                                                    |                           | 30 min / 197           | 11.3088 (14) | 3.8370 (4)  | 11.2277 (15) | 487.2 (1)              | 275                  |
|                                                                    |                           | 2 h / 197              | 11.3050 (21) | 3.8357 (6)  | 11.2197 (21) | 486.5 (1)              | 226                  |
|                                                                    | hydrothermal<br>treatment | 2 h / 160 <sup>a</sup> | 11.30 (1)    | 3.835 (3)   | 11.227 (12)  | 486 (1)                | 27                   |
|                                                                    |                           | 2 h / 200              | 11.3195 (30) | 3.8386 (8)  | 11.2363 (29) | 488.2 (2)              | 58                   |
|                                                                    |                           | 36 h / 200             | 11.3198 (38) | 3.8411 (10) | 11.2422 (40) | 488.8 (3)              | 55                   |
| Sb[S <sub>2</sub> CN(CH <sub>2</sub> ) <sub>5</sub> ] <sub>3</sub> | solvothermal<br>treatment | 5 min / 197            | 11.3150 (42) | 3.8380 (10) | 11.2347 (41) | 487.9 (3)              | 51                   |
|                                                                    |                           | 30 min / 197           | 11.3076 (23) | 3.8367 (6)  | 11.2270 (24) | 487.1 (2)              | 62                   |
|                                                                    |                           | 2 h / 197              | 11.3096 (15) | 3.8371 (4)  | 11.2283 (15) | 487.2 (1)              | 108                  |
|                                                                    | hydrothermal<br>treatment | 2 h / 160              | 11.3055 (52) | 3.8318 (14) | 11.2128 (55) | 487.7 (4)              | 49                   |
|                                                                    |                           | 2 h / 200              | 11.3098 (24) | 3.8372 (6)  | 11.2286 (24) | 487.3 (4)              | 68                   |
|                                                                    |                           | 36 h / 200             | 11.3135 (22) | 3.8378 (6)  | 11.2302 (22) | 487.6 (1)              | 83                   |
| Sb(S <sub>2</sub> CNMeCy) <sub>3</sub>                             | solvothermal<br>treatment | 5 min / 197            | 11.3139 (19) | 3.8386 (5)  | 11.2317 (20) | 487.8 (1)              | 100                  |
|                                                                    |                           | 30 min / 197           | 11.3153 (20) | 3.8390 (7)  | 11.2321 (3)  | 487.9 (1)              | 104                  |
|                                                                    |                           | 2 h / 197              | 11.3086 (27) | 3.8377 (7)  | 11.2274 (28) | 487.3 (2)              | 123                  |
|                                                                    | hydrothermal<br>treatment | 2 h / 160 <sup>b</sup> | -            | -           | -            | -                      | -                    |
|                                                                    |                           | 2 h / 200              | 11.3102 (22) | 3.8372 (6)  | 11.2303 (23) | 487.4 (2)              | 76                   |
|                                                                    |                           | 36 h / 200             | 11.3126 (20) | 3.8379 (5)  | 11.2290 (19) | 487.5 (1)              | 94                   |

**Table S(1c):** Lattice and Refinement Parameter of Sb<sub>2</sub>S<sub>3</sub> from Sb(dithiophosphate)<sub>3</sub> precursors

| Precursor                                                          | Method                 | Time/temp. (°C)        | <i>a</i>     | <i>b</i>   | <i>c</i>     | Vol (nm <sup>3</sup> ) | Av. cryst. size (nm) |
|--------------------------------------------------------------------|------------------------|------------------------|--------------|------------|--------------|------------------------|----------------------|
| Sb[S <sub>2</sub> P(OEt) <sub>2</sub> ] <sub>3</sub>               | solvothermal treatment | 5 min / 197            | 11.3039 (22) | 3.8370 (6) | 11.2295 (23) | 487.1 (2)              | 169                  |
|                                                                    |                        | 30 min / 197           | 11.3117 (12) | 3.8385 (3) | 11.2314 (11) | 487.6 (1)              | 405                  |
|                                                                    |                        | 2 h / 197              | 11.3104 (17) | 3.8403 (5) | 11.2409 (17) | 488.3 (1)              | 179                  |
|                                                                    | hydrothermal treatment | 2 h / 160 <sup>b</sup> | -            | -          | -            | -                      | -                    |
|                                                                    |                        | 2 h / 200              | 11.3104 (23) | 3.8400 (6) | 11.2352 (23) | 488.0 (2)              | 98                   |
|                                                                    |                        | 36 h / 200             | 11.3054 (19) | 3.8378 (5) | 11.2271 (20) | 487.1 (1)              | 132                  |
| Sb[S <sub>2</sub> P(O <sup>i</sup> Bu) <sub>2</sub> ] <sub>3</sub> | solvothermal treatment | 5 min / 197            | 11.3068 (18) | 3.8379 (5) | 11.2341 (18) | 487.5 (1)              | 250                  |
|                                                                    |                        | 30 min / 197           | 11.3073 (12) | 3.8368 (3) | 11.2292 (12) | 487.2 (1)              | 634                  |
|                                                                    |                        | 2 h / 197              | 11.3047 (15) | 3.8370 (4) | 11.2279 (15) | 487.0 (1)              | 335                  |
|                                                                    | hydrothermal treatment | 2 h / 160 <sup>b</sup> | -            | -          | -            | -                      | -                    |
|                                                                    |                        | 2 h / 200              | 11.3157 (32) | 3.8384 (8) | 11.2403 (32) | 488.2 (2)              | 94                   |
|                                                                    |                        | 36 h / 200             | 11.3104 (21) | 3.8379 (6) | 11.2336 (22) | 487.6 (2)              | 101                  |

<sup>a</sup> Peak broadening lead to large errors and the average crystal size is not certain; <sup>b</sup> No peaks were found in the diffractogram

Figure S(1a) TGA of  $\text{Sb}(\text{S}_2\text{COEt})_3$

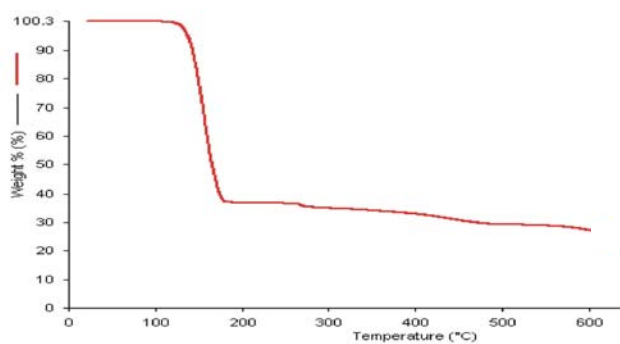

Figure S(1b) TGA of  $\text{Sb}(\text{S}_2\text{COPr}^i)_3$

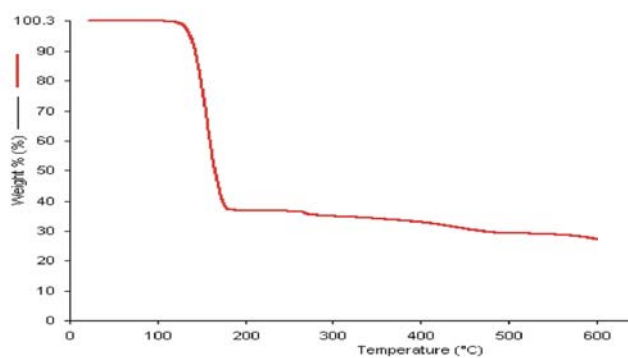

Figure S(2a) EDAX qualitative analysis of film grown from (2) at 200 °C.

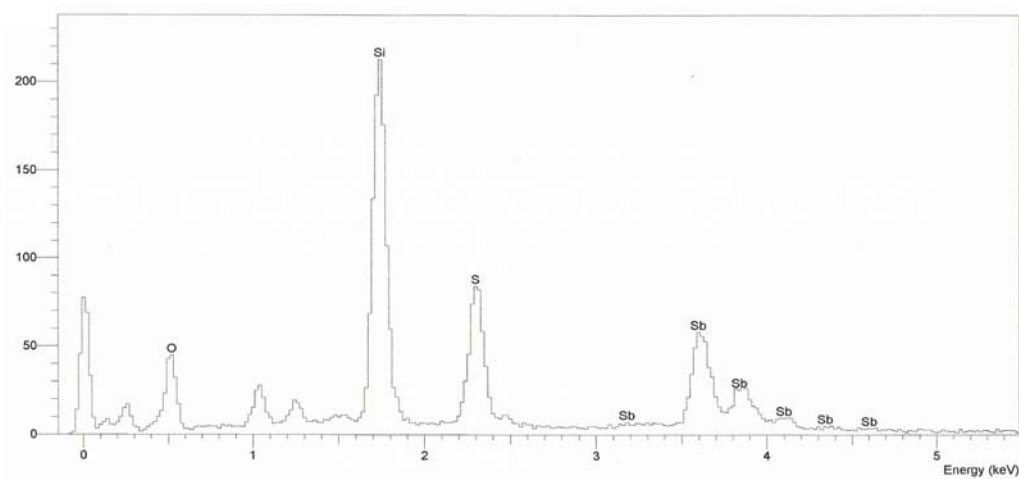

Figure S(2b) EDAX qualitative analysis of film grown from (3) at 240 °C on glass slides.

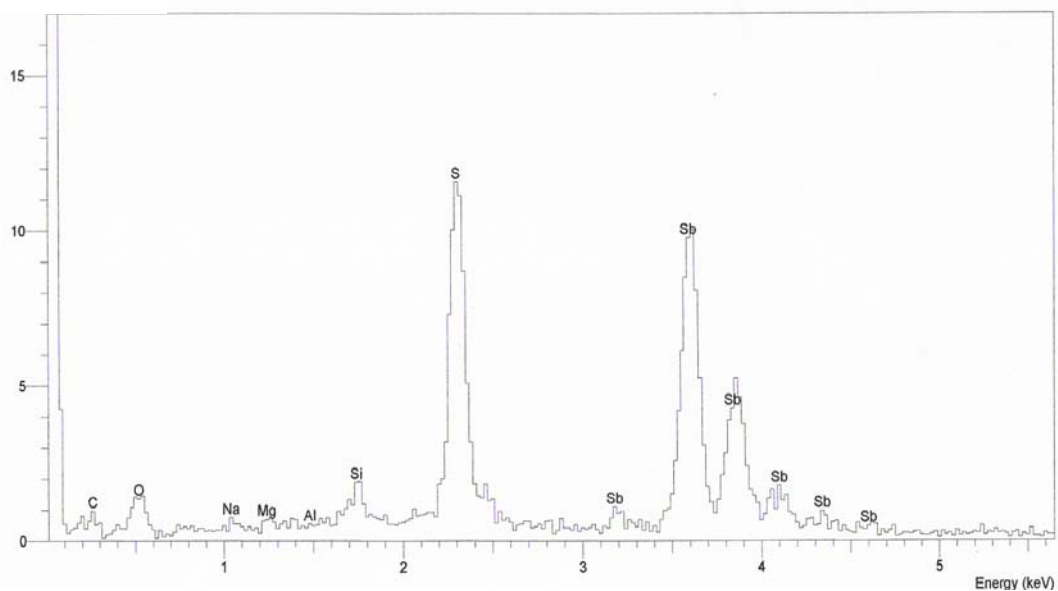

Supplement: b810947h.pdf [file b810947h.pdf]
